# Supplementary material
Source: Springer Nature journal article supplement (https://www.springermedizin.de/resource/supplementary/12873_2011_126_MOESM1_ESM.pdf/9431468)

**Percent**

100%  
90%  
80%  
70%  
60%  
50%  
40%  
30%  
20%  
10%  
0%

0

1

2

3

4

5

6

7

8

9

10+

**Number of ED visits**

■ Triage 1-3

■ Triage 4-5

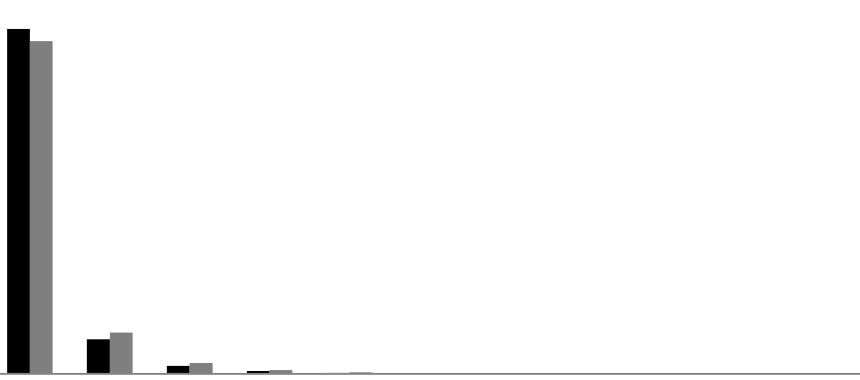

Supplement: MOESM1 [file 9431468]
